# Supplementary material for: Utilizing Gold Nanoparticles as Prospective Radiosensitizers in 3D Radioresistant Pancreatic Co-Culture Model
Source: MDPI journal article supplement (doi:10.3390/ijms241512523), 2023-08-07
Supplement: s1 [file s1]

# Utilizing Gold Nanoparticles as Prospective Radiosensitizers in 3D Radioresistant Pancreatic Co-Culture Model

Abdulaziz Alhussan <sup>1</sup>, Nolan Jackson <sup>1</sup>, Reinali Calisin <sup>1</sup>, Jessica Morgan <sup>2,3</sup>, Wayne Beckham <sup>1,4</sup> and Devika B. Chithrani <sup>1,4,5,6,7,\*</sup>

<sup>1</sup> Department of Physics and Astronomy, University of Victoria, Victoria, BC V8P 5C2, Canada; alhussan@uvic.ca (A.A.); nolanjackson12@uvic.ca (N.J.); rcalisin@uvic.ca (R.C.); wbeckham@bccancer.bc.ca (W.B.)

<sup>2</sup> Department of Biochemistry and Microbiology, University of Victoria, Victoria, BC V8P 5C2, Canada; jemorgan@bccrc.ca

<sup>3</sup> Trev and Joyce Deeley Research Centre, British Columbia Cancer-Victoria, Victoria, BC V8R 6V5, Canada

<sup>4</sup> Radiation Oncology, British Columbia Cancer-Victoria, Victoria, BC V8R 6V5, Canada

<sup>5</sup> Centre for Advanced Materials and Related Technologies, Department of Chemistry, University of Victoria, Victoria, BC V8P 5C2, Canada

<sup>6</sup> Department of Medical Sciences, University of Victoria, Victoria, BC V8P 5C2, Canada

<sup>7</sup> Department of Computer Science, Mathematics, Physics and Statistics, Okanagan Campus, University of British Columbia, Kelowna, BC V1V 1V7, Canada

\* Correspondence: devikac@uvic.ca

Supplementary Section S1: Monoculture Spheroids

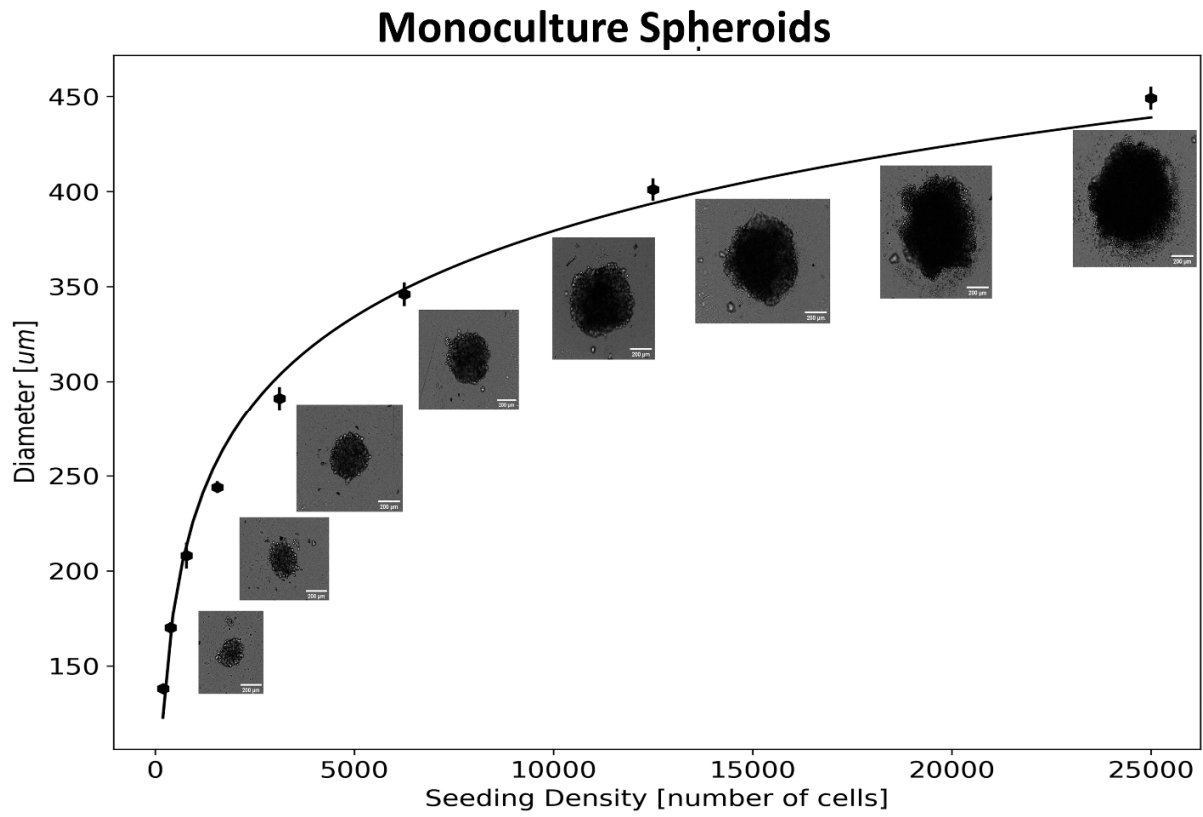

**Figure S1.** Characterizing pancreatic cancer 3D spheroid size. The size of the spheroids for MIA PaCa-2 monoculture under different initial cell count seeding. The scale bar is 200  $\mu\text{m}$ .

## Supplementary Section S2: GNPs Characterization

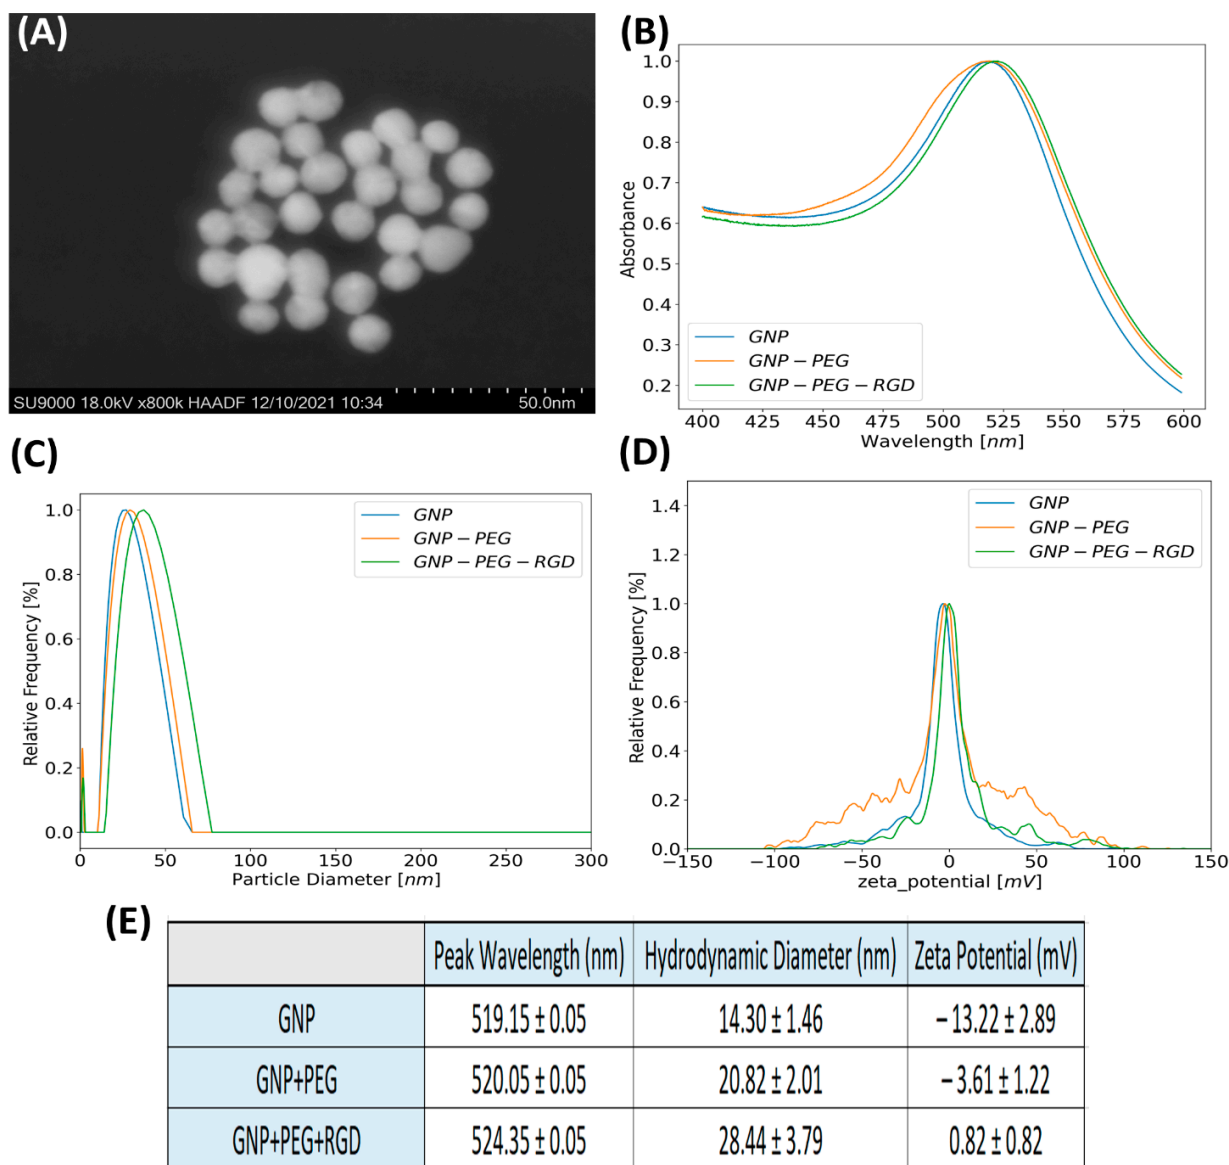

**Figure S2.** Gold nanoparticles (GNPs) characterization. **(A)** High-Angle Annular Darkfield (HAADF) Scanning Transmission Electron Microscopy (STEM) image of GNPs **(B)** UV-visible absorption spectra of GNPs, GNP<sub>PEG</sub>, and GNP<sub>PEG-RGD</sub>. **(C)** The hydrodynamic diameter of GNPs, GNP<sub>PEG</sub>, and GNP<sub>PEG-RGD</sub>. **(D)** The  $\zeta$ -potential of GNPs, GNP<sub>PEG</sub>, and GNP<sub>PEG-RGD</sub>. **(E)** A table outlines the peak absorption wavelength, hydrodynamic diameter, and mean  $\zeta$ -potential for GNPs, GNP<sub>PEG</sub>, and GNP<sub>PEG-RGD</sub>.

Supplementary Section S3: Spheroids Proliferation

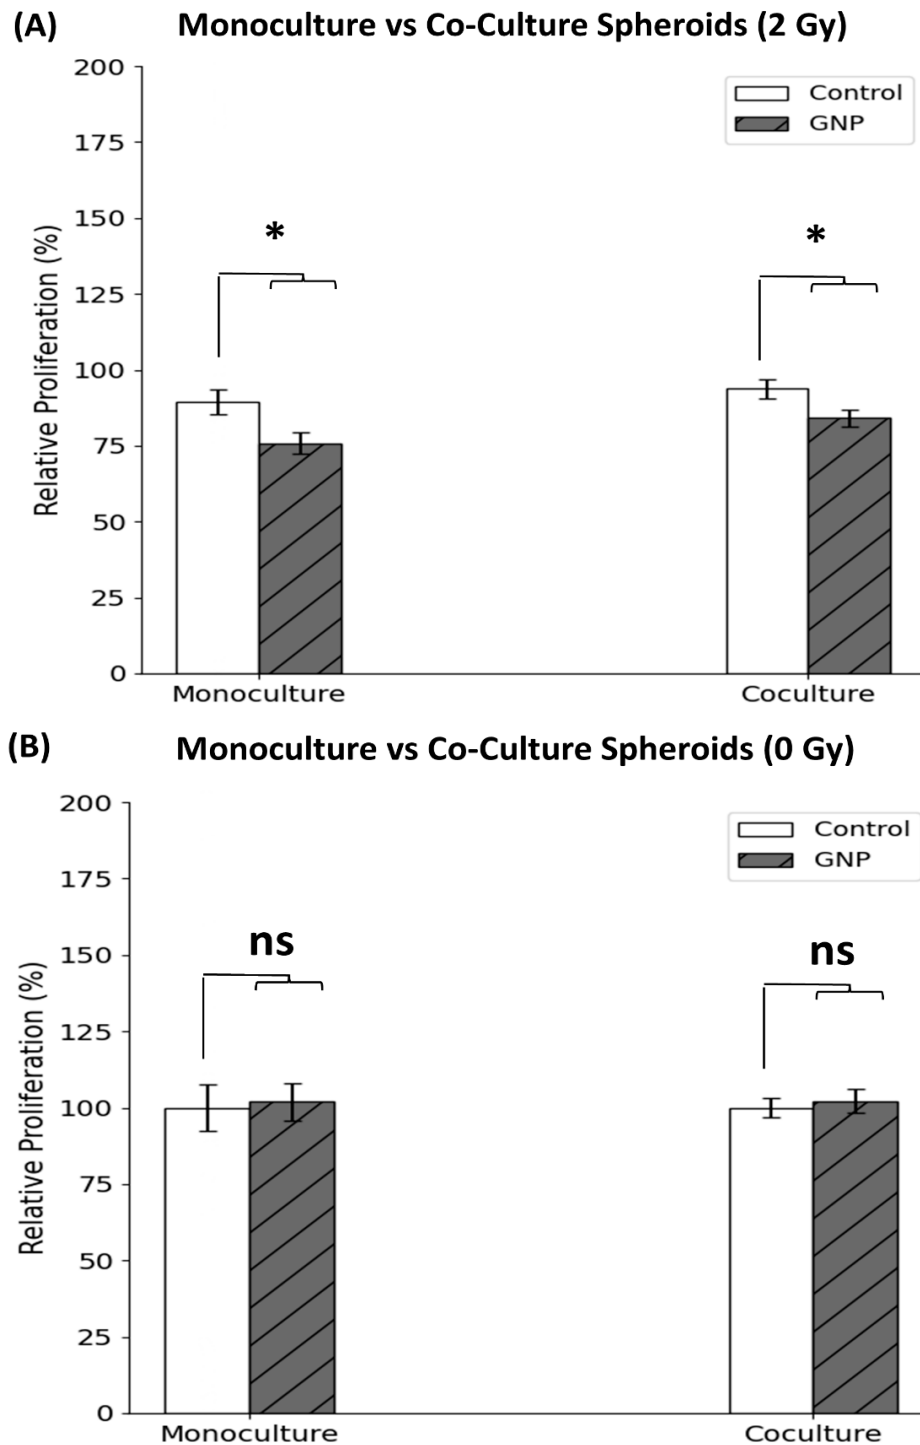

**Figure S3.** Monoculture vs co-culture spheroids proliferation post-treatment with radiation. **(A-B)** Irradiated spheroids **(A)** and non-irradiated spheroids **(B)** relative cell proliferation at day 14 post-treatment. ns indicates non-significance, \* indicates  $p < 0.05$ .
